# Supplementary material
Source: PubMed Central journal article supplement (PMC6499616)
Supplement: 10-1055-s-0039-1684008-s1800060.pdf [file 10-1055-s-0039-1684008-s1800060.pdf]

**Supplementary Table S1** Primers sequences for detection *PNKP* mutations

| <i>PNKP</i> mutation | Primer sequences, 5'→3' | Amplicon length, b. p. |
|----------------------|-------------------------|------------------------|
| c.1123G>T, c.1029A>G | F: CGACACGAGGTGCTTCTTGA | 798                    |
|                      | R: GAGGACATGAAAGGTCGGG  |                        |
| c.1270_1283dup14     | F: CGGGCACACTGGACGTA    | WT-178, mut-192        |
|                      | R: TGTGACCACGTGTGAGACAG |                        |
